# Supplementary material for: Magnetic circular dichroism spectroscopy of antiferromagnetically coupled hetero-metallic rings [H2NR2][Cr7MF8(O2CCMe3)16]
Source: Royal Society of Chemistry journal article supplement (doi:10.1039/b803269f), 2008-01-01
Supplement: b803269f.pdf [file b803269f.pdf]

## Supplementary Data

# Magnetic Circular Dichroism Spectroscopy of Antiferromagnetically Coupled Hetero-Metallic Rings [H<sub>2</sub>NR<sub>2</sub>][Cr<sub>7</sub>MF<sub>8</sub>(O<sub>2</sub>CMe<sub>3</sub>)<sub>16</sub>]

Justin M. Bradley\*, Andrew J. Thomson, Eric J.L. McInnes, Richard E.P. Winpenny,  
Grigore Timco

## Determination of the components of the lambda tensor

Calculation of the lambda tensor is greatly simplified by calculating the vector coupling coefficients in the octahedral group and treating the symmetry lowering distortions of the crystal field as a perturbation. The lambda tensor is made up of a sum of matrix elements describing the connection of the ground state to excited state terms via the orbital angular momentum operator. Each matrix element is decomposed into a reduced matrix element and a 3jm coefficient according to Wigner-Eckhart theorem.

$$\langle Sh\varphi | L_{\vartheta}^{\wedge T_{1g}} | S'h'\varphi' \rangle = \delta_{SS'} \begin{pmatrix} h \\ \vartheta \end{pmatrix} \begin{pmatrix} h T_1 h' \\ \varphi \vartheta \varphi' \end{pmatrix} \langle 2S+1 h \| L^{T_{1g}} \| 2S'+1 h' \rangle \quad (S1)$$

where S and S' are the ground and excited state spin angular momenta, h and h' the ground and excited state orbital angular momentum irreducible representations, h and h' the components of the ground and excited state irreducible representations, respectively, and  $\theta$  is the component of the irreducible representation of the orbital angular momentum operator. The  $\delta_{SS'}$  term accounts for the inability of the orbital angular momentum operators to mix states with different values of total spin.

All observed excited state terms of the d<sup>3</sup> configuration transform as E, T<sub>1</sub> or T<sub>2</sub> and in the octahedral point group the orbital angular momentum operator transforms as T<sub>1</sub>. All 3jm coefficients coupling the A<sub>2</sub> ground state to E and T<sub>1</sub> excited states via the components of T<sub>1</sub> are zero. Therefore <sup>4</sup>T<sub>2</sub> is the only low lying excited state which can contribute to the lambda tensor of a d<sup>3</sup> ion to second order of perturbation. T<sub>1</sub>(x) only connects A<sub>2</sub> with T<sub>2</sub>( $\xi$ ), T<sub>1</sub>(y) connects A<sub>2</sub> only with T<sub>2</sub>( $\eta$ ) and T<sub>1</sub>(z) connects A<sub>2</sub> only with T<sub>2</sub>( $\zeta$ ).

The non-zero matrix elements are then

$$\begin{aligned}
 \langle {}^4A_2 | L_x^{T1} | {}^4T_2 \xi \rangle &= \begin{pmatrix} A_2 \\ a_2 \end{pmatrix} \begin{pmatrix} A_2 & T_1 & T_2 \\ a_2 & x & \xi \end{pmatrix} \langle A_2 \| L^{T1} \| T_2 \rangle = 1 \cdot \frac{1}{\sqrt{3}} \cdot \langle A_2 \| L^{T1} \| T_2 \rangle \\
 \langle {}^4A_2 | L_y^{T1} | {}^4T_2 \eta \rangle &= \begin{pmatrix} A_2 \\ a_2 \end{pmatrix} \begin{pmatrix} A_2 & T_1 & T_2 \\ a_2 & y & \eta \end{pmatrix} \langle A_2 \| L^{T1} \| T_2 \rangle = 1 \cdot \frac{1}{\sqrt{3}} \cdot \langle A_2 \| L^{T1} \| T_2 \rangle \\
 \langle {}^4A_2 | L_z^{T1} | {}^4T_2 \zeta \rangle &= \begin{pmatrix} A_2 \\ a_2 \end{pmatrix} \begin{pmatrix} A_2 & T_1 & T_2 \\ a_2 & z & \zeta \end{pmatrix} \langle A_2 \| L^{T1} \| T_2 \rangle = 1 \cdot \frac{1}{\sqrt{3}} \cdot \langle A_2 \| L^{T1} \| T_2 \rangle \\
 \langle {}^4T_2 \xi | L_x^{T1} | {}^4A_2 \rangle &= \begin{pmatrix} T_2 \\ \xi \end{pmatrix} \begin{pmatrix} T_2 & T_1 & A_2 \\ \xi & x & a_2 \end{pmatrix} \langle T_2 \| L^{T1} \| A_2 \rangle = -1 \cdot \frac{1}{\sqrt{3}} \cdot \langle T_2 \| L^{T1} \| A_2 \rangle \\
 \langle {}^4T_2 \eta | L_y^{T1} | {}^4A_2 \rangle &= \begin{pmatrix} T_2 \\ \eta \end{pmatrix} \begin{pmatrix} T_2 & T_1 & A_2 \\ \eta & y & a_2 \end{pmatrix} \langle T_2 \| L^{T1} \| A_2 \rangle = 1 \cdot \frac{1}{\sqrt{3}} \cdot \langle T_2 \| L^{T1} \| A_2 \rangle \\
 \langle {}^4T_2 \zeta | L_z^{T1} | {}^4A_2 \rangle &= \begin{pmatrix} T_2 \\ \zeta \end{pmatrix} \begin{pmatrix} T_2 & T_1 & A_2 \\ \zeta & z & a_2 \end{pmatrix} \langle T_2 \| L^{T1} \| A_2 \rangle = -1 \cdot \frac{1}{\sqrt{3}} \cdot \langle T_2 \| L^{T1} \| A_2 \rangle
 \end{aligned} \tag{S2}$$

The reduced matrix elements are then evaluated by equating the  ${}^4A_2$  to  ${}^4T_2$  transition to the difference between the two strong field configurations  $t_{2g}^3$  and  $t_{2g}^2 e_g$  and applying the  $SO_3 \supset O$  group chain. Since the spin independent unit tensor operator

$$\langle nl \| u^k \| n'l' \rangle \equiv \delta_{m'} \delta_{l'}$$

transforms as the  $|jm\rangle$  of  $SO_3$  the one electron reduced matrix elements for the angular momentum operator in  $SO_3$  is simply related to this unit tensor.

$$\langle nl \| l \| n'l' \rangle = \delta_{m'} \delta_{l'} \cdot [l(l+1)(2l+1)]^{1/2} \tag{S3}$$

Therefore,

$$\begin{aligned}
 \langle A_2 \| L^{T1} \| T_2 \rangle &= \langle T_2 \| L^{T1} \| A_2 \rangle = \langle t_2 \| l^{t_1} \| e_g \rangle = \begin{pmatrix} 2 & 1 & 2 \\ T_2 & T_1 & E \end{pmatrix} \begin{matrix} SO_3 \\ O \end{matrix} \cdot [l(l+1)(2l+1)]^{1/2} \\
 &= -\frac{\sqrt{2}}{\sqrt{5}} \cdot \sqrt{(2 \cdot 3 \cdot 5)} = -2\sqrt{3}
 \end{aligned} \tag{S4}$$

where the 3jm factor relates the matrix element of angular momentum in the  $SO_3$  basis to that in  $O$ . Substitution of this value into equation A1 yields the components of the lambda tensor in octahedral symmetry. The corresponding components in the  $C_{2v}$  point group are calculated by applying the chain of groups approach to determine 3jm factors by which the above 3jm coefficients are multiplied in order to account for the lowering in symmetry. Following the chain

$O_h \supset D_{4h} \supset D_{2d} \supset C_{2v}$  yields the following branching of the electronic terms (the symbol in parenthesis being the label in the natural system corresponding to the given Mulliken label)

| $O_h$               | $D_{4h}$                   | $D_{2d}$              | $C_{2v}$                               |
|---------------------|----------------------------|-----------------------|----------------------------------------|
| $A_{2g}(\tilde{0})$ | $B_{1g}(2)$                | $A_1(0)$              |                                        |
| $T_{1g}(1)$         | $A_{2g}(\tilde{0})+E_g(1)$ | $A_2(\tilde{0})+E(1)$ | $A_2(\tilde{0})+B_1(1)+B_2(\tilde{1})$ |
| $T_{2g}(\tilde{1})$ | $B_{2g}(\tilde{2})+E_g(1)$ | $B_1(\tilde{2})+E(1)$ | $A_2(\tilde{0})+B_1(1)+B_2(\tilde{1})$ |

For example the 3jm coefficient

$$\begin{pmatrix} A_2 & T_1 & T_2 \\ a_2 & x & \xi \end{pmatrix} \text{ becomes}$$

$$\begin{pmatrix} A_{2g} & T_{1g} & T_{2g} \\ a_2 & x & \xi \end{pmatrix} \cdot \begin{pmatrix} A_{2g} & T_{1g} & T_{2g} \\ B_{1g} & E_g & E_g \end{pmatrix} D_{4h} \cdot \begin{pmatrix} B_{1g} & E_g & E_g \\ B_2 & E & E \end{pmatrix} D_{2d} \cdot \begin{pmatrix} B_2 & E & E \\ A_1 & B_2 & B_2 \end{pmatrix} D_{2d} C_{2v}$$

$$= \begin{pmatrix} A_{2g} & T_{1g} & T_{2g} \\ a_2 & x & \xi \end{pmatrix} \cdot \frac{\sqrt{2}}{\sqrt{3}} \cdot 1 \cdot \frac{-1}{\sqrt{2}} = \frac{-1}{\sqrt{3}} \begin{pmatrix} A_{2g} & T_{1g} & T_{2g} \\ a_2 & x & \xi \end{pmatrix} \quad (S5)$$

that is the 3jm coefficient of the octahedral group is multiplied by a factor of  $-1/\sqrt{3}$  to account for the lowering of the symmetry to  $C_{2v}$ . Application of the above procedure to the remaining non-zero 3jm factors leads to the result,

$$\Lambda_{zz} = \frac{4}{3 \cdot \Delta E_1}; \Lambda_{yy} = \frac{4}{3 \cdot \Delta E_2}; \Lambda_{xx} = \frac{4}{3 \cdot \Delta E_3} \quad (S6)$$

where  $\Delta E_1 = E(^4A_1 \rightarrow a^4A_2)$ ,  $\Delta E_2 = E(^4A_1 \rightarrow a^4B_1)$  and  $\Delta E_3 = E(^4A_1 \rightarrow a^4B_2)$
